# Circulating microRNAs as noninvasive biomarkers for canine Cushing's syndrome

1 Karin Sanders<sup>1\*</sup>, Anouk Veldhuizen<sup>1</sup>, Hans S. Kooistra<sup>1</sup>, Adri Slob<sup>1</sup>, Elpetra P.M. Timmermans-  
2 Sprang<sup>1</sup>, Frank M. Riemers<sup>1</sup>, Sylvie Daminet<sup>2</sup>, Federico Fracassi<sup>3</sup>, Sebastiaan A. van Nimwegen<sup>1</sup>,  
3 Björn P. Meij<sup>1</sup>, Sara Galac<sup>1</sup>

4 <sup>1</sup>Department of Clinical Sciences, Faculty of Veterinary Medicine, Utrecht University, The  
5 Netherlands

6 <sup>2</sup>Small Animal Department, Faculty of Veterinary Medicine, Ghent University, Merelbeke,  
7 Belgium

8 <sup>3</sup>Department of Veterinary Medical Sciences, University of Bologna, Ozzano dell'Emilia,  
9 Bologna, Italy

10

11 \* **Correspondence:**

12 Karin Sanders

13 [k.sanders@uu.nl](mailto:k.sanders@uu.nl)

14

15 **Keywords: miRNA, pituitary-dependent hypercortisolism, Cushing's disease,**  
16 **adrenocortical tumor, miR-122, prognostic, recurrence, normalization**

17

18 **Abstract**

19 Canine Cushing's syndrome (hypercortisolism) can be caused by a pituitary tumor (pituitary-  
20 dependent hypercortisolism; PDH) or a cortisol-secreting adrenocortical tumor (csACT). For both  
21 cases, noninvasive biomarkers that could pre-operatively predict the risk of recurrence after surgery  
22 would greatly impact clinical decision making. The aim of this study was to determine whether  
23 circulating microRNAs (miRNAs) can be used as noninvasive biomarkers for canine Cushing's  
24 syndrome.

25 After a pilot study with 40 miRNAs in blood samples of healthy dogs ( $n = 3$ ), dogs with PDH ( $n =$   
26  $3$ ) and dogs with a csACT ( $n = 4$ ), we selected a total of 20 miRNAs for the definitive study. In the  
27 definitive study, these 20 miRNAs were analyzed in blood samples of healthy dogs ( $n = 6$ ), dogs  
28 with PDH ( $n = 19$ , pre- and post-operative samples) and dogs with a csACT ( $n = 26$ , pre-operative  
29 samples).

30 In dogs with PDH, six miRNAs (miR-122-5p, miR-126-5p, miR-141-3p, miR-222-3p, miR-375-  
31 3p and miR-483-3p) were differentially expressed compared to healthy dogs. Of one miRNA, miR-  
32 122-5p, the expression levels did not overlap between healthy dogs and dogs with PDH ( $p = 2.9 \times 10^{-}$   
33  $4$ ), significantly decreased after hypophysectomy ( $p = 0.013$ ), and were significantly higher ( $p =$   
34  $0.017$ ) in dogs with recurrence ( $n = 3$ ) than in dogs without recurrence for at least one year after  
35 hypophysectomy ( $n = 7$ ). In dogs with csACTs, two miRNAs (miR-483-3p and miR-223-3p) were  
36 differentially expressed compared to healthy dogs. Additionally, miR-141-3p was expressed  
37 significantly lower ( $p = 0.009$ ) in dogs with csACTs that had a histopathological Utrecht score of  
38  $\geq 11$  compared to those with a score of  $< 11$ .

39 These results indicate that circulating miRNAs have the potential to be noninvasive biomarkers in  
40 dogs with Cushing's syndrome that may contribute to clinical decision-making.

41

## 42        **1 Introduction**

43 Spontaneous Cushing's syndrome, or hypercortisolism, is one of the most commonly diagnosed  
44 endocrinopathies in dogs (1). It is caused by an ACTH-secreting pituitary tumor (pituitary-  
45 dependent hypercortisolism; PDH) in ~80-85% of cases, and by a cortisol-secreting adrenocortical  
46 tumor (csACT) in ~15-20% of cases (1). Both PDH and csACT can be treated by surgically  
47 removing the causative tumor. Because surgery is not without risks and not suitable for every  
48 patient, dogs with Cushing's syndrome are often treated with the steroidogenesis inhibitor trilostane  
49 (2). Although trilostane can effectively reduce the clinical signs associated with hypercortisolism,  
50 it does not inhibit tumor growth (3).

51 Pituitary tumors are usually classified as adenomas, but can nonetheless compress or invade  
52 surrounding tissues (4). After hypophysectomy, recurrence of hypercortisolism occurs in ~23-27%  
53 of cases (5,6), for which the most important predictive marker is the pituitary height to brain area  
54 value (P/B value) (6). To determine the P/B value, diagnostic imaging with CT or MRI is necessary.  
55 The mRNA expression of pituitary tumor transforming gene 1 (*PTTG1*) was previously reported to  
56 be associated with disease-free interval after surgery, but can only be assessed post-operatively (7).

57 A csACT can be classified as an adrenocortical adenoma (ACA) or an adrenocortical carcinoma  
58 (ACC) (8), but making this distinction can be difficult (9). After adrenalectomy, recurrence of  
59 hypercortisolism occurs in ~30-38% of cases (9,10), but predicting recurrence remains challenging.  
60 We have recently developed a novel histopathological scoring system, the Utrecht score, to predict  
61 the prognosis of dogs after adrenalectomy (9). In addition, we have identified three genes of which  
62 the mRNA expression in csACTs was associated with survival after adrenalectomy (11). However,  
63 these markers can only be assessed when the csACT has already been surgically removed. The only  
64 known pre-operative marker that is associated with survival after adrenalectomy is the tumor  
65 diameter, but has low predictive value (9,12).

66 Having noninvasive biomarkers that can pre-operatively predict the risk of recurrence after surgery  
67 would greatly impact clinical decision making. Potential candidates for such noninvasive  
68 biomarkers are circulating microRNAs (miRNAs; miRs). MiRNAs are single-stranded, non-coding  
69 RNAs of ~20-24 nucleotides in size (13). They function as antisense RNAs which regulate their  
70 target genes post-transcriptionally, and can influence cellular differentiation, proliferation and  
71 apoptosis (13,14). MiRNA expression patterns can be altered in multiple diseases, including cancer.  
72 MiRNAs that are expressed higher in cancer are regarded as oncomiRs, while miRNAs that are  
73 expressed lower in cancer are regarded as tumor suppressor miRNAs (13). Most miRNAs are  
74 expressed intracellularly, but numerous miRNAs can also be found in biological fluids such as  
75 blood, urine, saliva, and cerebrospinal fluid. These miRNAs are referred to as circulating miRNAs  
76 (15). MiRNAs that are detectable in plasma or serum samples are bound with lipid proteins or  
77 encapsulated in extracellular vesicles and are therefore resistant to RNase digestions (13).  
78 Consequently, their expression levels are remarkably stable, which makes them ideal candidates as  
79 noninvasive biomarkers for various diseases (13).

80 The aim of this study was to determine whether circulating miRNAs can be used as noninvasive  
81 biomarkers for canine Cushing's syndrome. We aimed to identify miRNAs associated with the  
82 presence or absence of PDH or a csACT, the size of the pituitary tumor and whether PDH recurred  
83 after hypophysectomy, and the histopathological assessment of a csACT.

## 84        2    Materials & Methods

### 85    2.1 *Pilot study*

#### 86    2.1.1 *Animals and samples*

87    For the pilot study, we included blood samples of healthy dogs ( $n = 3$ ), dogs with csACTs ( $n = 4$ ),  
88    and dogs with PDH ( $n = 3$ ). Written informed consent was obtained from the owners for the  
89    participation of their animals in this study. Serum samples were available from the healthy dogs  
90    and dogs with csACTs, while EDTA plasma samples were available from the dogs with PDH. After  
91    sample collection, serum or EDTA plasma was obtained by centrifuging whole blood for 5 min at  
92    4000 rpm. The serum and EDTA plasma samples were stored at  $-70^{\circ}\text{C}$  until use.

93    The suspicion of hypercortisolism was based on the dogs' medical history and findings during  
94    physical examination. The diagnosis of PDH was made by demonstration of suppressible  
95    hypercortisolism with endocrine testing (low-dose dexamethasone suppression test or urinary  
96    corticoid to creatinine ratios (UCCR) combined with high-dose dexamethasone suppression test),  
97    or non-suppressible hypercortisolism combined with findings of symmetric bilateral adrenal  
98    enlargement (indicating bilateral hyperplasia) and the absence of unilateral adrenal enlargement  
99    (indicating an ACT) on ultrasonography or CT, together with findings of pituitary enlargement on  
100    CT or MRI. The diagnosis of a csACT was made by non-suppressible hypercortisolism  
101    demonstrated with endocrine testing, combined with the presence of an ACT found on  
102    ultrasonography or CT. All pituitary tumors were classified as adenomas based on histopathological  
103    assessment and absence of detectable metastases (4). Histopathological assessment of the ACTs  
104    confirmed their adrenocortical origin, and the histopathological Utrecht score (Ki67 proliferation  
105    index (PI) + 4 if  $\geq 33\%$  of cells have clear/vacuolated cytoplasm + 3 if necrosis is present) was used  
106    to predict the risk of recurrence (9). The dogs in the "healthy" group were regarded as healthy based  
107    on the absence of clinical signs, no abnormalities in complete blood count and blood biochemistry,  
108    and UCCRs within reference values.

109

#### 110    2.1.2 *MiRNA isolation and cDNA synthesis*

111    MiRNA was isolated using the miRNeasy Serum/Plasma Kit (Qiagen, Venlo, the Netherlands)  
112    according to the manufacturer's instructions. The serum and EDTA plasma samples were thawed  
113    on ice. As sample input 150  $\mu\text{L}$  was used, and volumes of the other components were adjusted  
114    accordingly. The miRNeasy serum/plasma kit was combined with the RNA Spike-In Kit, For RT  
115    (Qiagen) for miRNA isolation quality control. The mixture of spike-ins UniSp2, UniSp4 and  
116    UniSp5 was prepared according to the manufacturer's instructions, and 1  $\mu\text{L}$  of the spike-in mixture  
117    was added per sample. After isolation, the miRNA eluates were stored at  $-20^{\circ}\text{C}$  until use. For  
118    subsequent cDNA synthesis, miRNA samples were thawed on ice. The cDNA was synthesized  
119    using the miRCURY LNA RT Kit (Qiagen) according to the manufacturer's instructions, using 2  
120     $\mu\text{L}$  of RNA template per 10  $\mu\text{L}$  total reaction volume. For cDNA synthesis quality control, 0.5  $\mu\text{L}$   
121    of a mixture of spike ins UniSp6 and cel-miR-39-3p (Qiagen) was added to the cDNA reaction.  
122    The cDNA samples were stored at  $4^{\circ}\text{C}$  when real-time quantitative polymerase chain reaction (RT-  
123    qPCR) was performed within four days after cDNA synthesis, or at  $-20^{\circ}\text{C}$  when the RT-qPCR was  
124    performed at a later timepoint.

125

### 126 *2.1.3 RT-qPCR: Quality Control*

127 For all samples, a quality control was performed to detect the presence of spike-ins UniSp2, UniSp4  
128 and UniSp5 (to assess efficiency of miRNA isolation), of UniSp6 and cel-miR-39-3p (to assess  
129 efficiency of cDNA synthesis), and of the miRNAs miR-23a and miR-191 (to assess efficiency of  
130 endogenous miRNAs detection). To obtain miRNA-specific primers we checked the canine  
131 sequences on the miRBase database (16), and ordered miRCURY LNA miRNA PCR Assays  
132 (Qiagen; sequences and category numbers available through online data repository (17)). The  
133 cDNA samples were diluted 1:15, and 3  $\mu$ L of diluted cDNA was used per well in a total reaction  
134 volume of 10  $\mu$ L. Detection of targets was performed with miRCURY LNA SYBR® Green PCR  
135 Kits (Qiagen) according to the manufacturer's instructions in a MyiQ™2 Two-Color Real-Time  
136 PCR Detection System (Bio-Rad, Veenendaal, The Netherlands).

137

### 138 *2.1.4 RT-qPCR: Custom plates*

139 For the pilot study, miRCURY LNA miRNA Custom PCR Panels 96-well plates were ordered from  
140 Qiagen. These ready-to-use plates contained specific primer sets pre-coated in the wells. For each  
141 sample, 48 reactions were performed: UniSp3 (interplate calibrator for optimal calibration and  
142 control assessment), UniSp6 (cDNA spike-in control), one non-template control, five potential  
143 reference miRNAs, and 40 potential target miRNAs (Qiagen; sequences and category numbers  
144 available through online data repository (17)). Detection of targets was performed with miRCURY  
145 LNA SYBR® Green PCR Kits (Qiagen) according to the manufacturer's instructions in a MyiQ™2  
146 Two-Color Real-Time PCR Detection System (Bio-Rad). The threshold for detection of  
147 fluorescence was manually adjusted to 40 Relative Fluorescent Units to obtain the same threshold  
148 for each plate. The geometric mean of the five potential reference miRNAs was used to normalize  
149 the data. The relative expression of the target miRNAs was calculated using the  $2^{-\Delta\Delta CT}$  method (18).

150

## 151 *2.2 Definitive study*

### 152 *2.2.1 Animals*

153 For the definitive study, we included blood samples of healthy dogs ( $n = 6$ ), pre-operative blood  
154 samples of dogs with csACTs ( $n = 26$ ), and both pre- and post-operative samples of dogs with PDH  
155 ( $n = 19$ ). The blood samples from the pilot study were also included in the definitive study. Written  
156 informed consent was obtained from the owners for the participation of their animals in this study.  
157 For all dogs with PDH, surgery and sample collection were performed at the Faculty of Veterinary  
158 Medicine in Utrecht, as was the sample collection for the healthy dogs. For dogs with csACTs, the  
159 surgery and sample collection were performed at the Utrecht University Clinic or at external clinics.  
160 In case of external clinics, the samples were sent by post to the Faculty of Veterinary Medicine in  
161 Utrecht. For the healthy dogs both EDTA plasma and serum samples were available. For the dogs  
162 with PDH only EDTA plasma samples were available, while for the dogs with csACTs only serum  
163 samples were available. Because of these differences in sample types, miRNA expression levels  
164 were not compared between dogs with PDH and with csACTs, but only between dogs with either

165 PDH or csACTs and healthy controls of corresponding sample types. Samples for the dogs with  
166 PDH and csACTs were collected between 2015 and 2020, samples for the healthy dogs were  
167 collected between 2019 and 2020. The clinical data of the dogs included in this study can be found  
168 in an online data repository (17).

169 Diagnoses of PDH and csACTs were made as described for the pilot study, as were the  
170 confirmations of healthy dogs. Recurrence of hypercortisolism after hypophysectomy was  
171 suspected based on recurrence of clinical signs, and confirmed by UCCR values above the reference  
172 range.

173

### 174 2.2.2 RT-qPCR

175 Isolation of miRNAs from the blood samples and subsequent cDNA synthesis was performed as  
176 described for the pilot study. Quality control was first performed on all samples to determine  
177 efficiency of miRNA isolation, cDNA reaction, and detection of endogenously expressed miRNAs.  
178 For the definitive study, we pre-coated 384-well plates with a mixture containing the PCR primer  
179 mix (Qiagen; sequences and category numbers available through online data repository (17)),  
180 miRCURY LNA SYBR® Green PCR Kits (Qiagen), and nuclease-free water. The plates were  
181 stored at -20°C until further use. The assessed targets in the definitive study included five potential  
182 reference miRNAs and 15 potential target miRNAs, selected based on the pilot study. Detection of  
183 miRNAs was performed in a CFX384 Touch Real-Time PCR Detection system (Bio-Rad).

184

### 185 2.2.3 Data analysis

186 To determine the pairwise variance and stability of miRNA expression, the geNorm (19) method  
187 from the SLqPCR package (v1.52.0, (20) using R (v3.6, (21) and RStudio (v1.3.1093, 21) was used.  
188 Data normalization was performed by subtracting the geometric mean of the CT values of the 12  
189 most stably expressed miRNAs from the CT values of the target miRNAs ( $\Delta CT$ ). The relative  
190 expression of the target miRNAs was calculated using the  $2^{-\Delta\Delta CT}$  method (18). Normal distribution  
191 was assessed with the Shapiro-Wilk test. Because the data were not normally distributed, the Mann-  
192 Whitney U-test was performed to determine the significance of differences in expression between  
193 groups for independent samples, while paired sample analysis was performed with the Wilcoxon  
194 signed-rank test. The Spearman's rank correlation coefficient test was used to assess correlation  
195 between variables. *P*-values <0.05 were considered significant. All statistical analyses were  
196 performed with SPSS Statistics for Windows (Version 27.0, IBM Corp, Armonk, NY, USA).

197 The datasets generated for this study can be found in the DataverseNL data repository (17, *made*  
198 *publicly available upon publication*).

199

200

## 201        **3 Results**

### 202        **3.1 Pilot study**

#### 203        *3.1.1 Quality control*

204        The quality control results (available through online data repository (17)) indicated that highly  
205        (mimicked by UniSp2), moderately (UniSp4), and lowly (UniSp5) expressed miRNAs could all be  
206        efficiently isolated and detected with our protocol, and that highly (UniSp6) and moderately (cel-  
207        miR-39-3p) expressed miRNAs were efficiently transcribed to cDNA. In addition, the detection of  
208        miR-23 and miR-191 in all the samples indicated that endogenously present miRNAs were also  
209        efficiently detected.

#### 210        *3.1.2 Target miRNAs*

211        Of the 40 target miRNAs assessed in the pilot study (results available through online data repository  
212        (17)), 6 were not detected in any samples (miR-34a-5p, miR-96-5p, miR-144-3p, miR-210-3p,  
213        miR-300-5p and miR-381-3p), while another 8 were not detected in most samples (miR-139-3p,  
214        miR-183-5p, miR-433-3p, miR-499a-5p, miR-455-5p, miR-483-5p, miR-497-5p, miR-499-5p).  
215        From the remaining 26 miRNAs, 15 miRNAs were selected for further analyses. The selected  
216        miRNAs showed potential differences in expression between patient groups or were potentially  
217        associated with the P/B value in the PDH group or with histopathological assessment in the csACT  
218        group.

219

### 220        **3.2 Definitive study**

#### 221        *3.2.1 Stably expressed miRNAs*

222        Five miRNAs were initially included in this study as normalization controls because we expected  
223        their expression levels to be stable: miR-23-3p, miR-191-5p, miR-222-3p, miR-423-5p and miR-  
224        425-5p. The selection of these miRNAs was based on endogenous miRNAs that are typically  
225        detected and stably expressed in human serum/plasma samples according to the Qiagen Guidelines  
226        for Profiling Biofluid miRNAs ©2019. We used geNorm software (19) to determine whether these  
227        miRNAs were indeed stably expressed in EDTA plasma samples ( $n = 44$ ; 6 healthy dogs and 19  
228        dogs with PDH, pre-op and post-op), in serum samples ( $n = 32$ ; 6 healthy dogs and 26 dogs with  
229        csACT), and in the combined EDTA plasma/serum samples. The combination of miRNAs was  
230        interpreted as suitably stable when the Pairwise Variance (V-score) was lower than 0.15 ( $V_{0.15}$ )  
231        (19,23). However, although the V-score decreased when all 5 miRNAs were used compared to  
232        when 3 or 4 miRNAs were used, they did not reach the  $V_{0.15}$  (Figure 1A).

233        To determine whether the  $V_{0.15}$  would be reached when more miRNAs were included in the  
234        analysis, we assessed the stability of all 20 assessed miRNAs, including the 15 intended target  
235        miRNAs. Only the miRNAs that could be detected in all samples were included, which left 16  
236        miRNAs for the geNorm analysis (5 of the originally intended reference miRNAs and 11 target  
237        miRNAs). The lowest V-score ( $V_{\min}$ ; 0.115) in the combined EDTA plasma/serum samples group  
238        (“All”) was achieved with a combination of 12 miRNAs (Figure 1B). The most stably expressed  
239        miRNAs in both EDTA plasma and serum sample groups was miR-191-5p, while the least stably

240 expressed miRNAs in all sample groups were miR-122-5p, miR-483-3p, and miR-375-3p (Figure  
241 1C). Overall, both the V-scores (Figure 1B) and the Average expression stability M (Figure 1C)  
242 were lower in the EDTA plasma samples group than in the serum samples group.

243 For the subsequent analyses, we analyzed the expression levels of all 20 miRNAs. The geometric  
244 mean of the  $V_{\min}$  (12 most stably expressed miRNAs) was used as normalization control.

245

### 246 3.2.2 MiRNAs in Pituitary-Dependent Hypercortisolism

247 In the EDTA plasma samples, five miRNAs were expressed significantly higher in dogs with PDH  
248 ( $n = 19$ ) compared to healthy dogs ( $n = 6$ ): miR-122-5p ( $p = 2.9 \times 10^{-4}$ ; no overlap between groups),  
249 miR-141-3p ( $p = 0.028$ ), miR-222-3p ( $p = 0.008$ ), miR-375-3p ( $p = 0.001$ ), and miR-483-3p ( $p =$   
250 0.009) (Figure 2A). One miRNA was expressed significantly lower in dogs with PDH compared to  
251 healthy dogs: miR-126-5p ( $p = 0.036$ ) (Figure 2A).

252 Of all 19 dogs with PDH, post-op samples were available. The timepoint of post-op sample  
253 collection was at median 3 days after hypophysectomy (range 1-7 days). The six differentially  
254 expressed miRNAs were analyzed in the post-op EDTA plasma samples, to determine whether their  
255 expression levels either decreased or increased after surgery. Paired-sample analyses of these six  
256 miRNAs showed that the expression levels of miR-122-5p ( $p = 0.013$ ) and of miR-141-3p ( $p =$   
257 0.035) significantly decreased after surgery (Figure 2B). Although miR-222-3p and miR-375-3p  
258 showed a tendency to decrease based on Figure 2B, these changes were not significant ( $p = 0.117$   
259 and  $p = 0.165$ , respectively). The expression levels of miR-126-5p and miR-483-3p did not change  
260 in the post-op samples ( $p = 0.647$  and  $p = 0.520$ , respectively).

261

#### 262 3.2.2.1 Association of miRNAs with recurrence of PDH

263 Because the P/B value is currently the most important predictor of recurrence after  
264 hypophysectomy, we analyzed whether expression levels of miRNAs (pre-operative samples) were  
265 correlated with the P/B value. None of the six differentially expressed miRNAs were significantly  
266 correlated with the P/B value, nor were any of the other fourteen miRNAs (Table 1).

267 Of the 19 dogs with PDH, follow-up information was available of 14 dogs. Of these dogs, 3 had  
268 recurrence of hypercortisolism (5, 7 and 12 months after hypophysectomy), 7 dogs had no  
269 recurrence of hypercortisolism and had follow-up of at least one year after surgery (median follow-  
270 up time 21 months, range 16 – 50 months), and 4 dogs had no recurrence of hypercortisolism but  
271 follow-up times of less than one year after surgery (median 5 months, range 2 – 8 months). The 3  
272 dogs with reported recurrence were subsequently included in the “Recurrence” group, while the 7  
273 dogs without recurrence and with follow-up time of at least one year after surgery were included in  
274 the “No recurrence” group. In assessing the expression profiles of the six differentially expressed  
275 miRNAs in the pre-operative samples, we found that miR-122-5p ( $p = 0.017$ ) and miR-222-3p ( $p$   
276 = 0.030) were expressed significantly higher in the dogs with recurrence than in the dogs without  
277 recurrence (Figure 2C).

278



### 279 3.2.2.2 Differentially expressed miRNAs with one reference miRNA

280 Because the clinical application of miRNAs is limited when 12 miRNAs need to be assessed for  
281 data normalization, we wanted to determine whether the detected differences could still be observed  
282 when only one reference miRNA was used. As the most stably expressed miRNA in all sample  
283 groups, we chose to use the expression of miR-191-5p for data normalization. Although miR-126-  
284 5p lost its significance ( $p = 0.105$ ), the other five miRNAs were still significantly higher in dogs  
285 with PDH compared to healthy dogs (Figure 3A) when normalized to only miR-191-5p. MiR-122-  
286 5p was equally significant when only one reference miRNA was used ( $p = 2.9 \times 10^{-4}$ ) because still  
287 no overlap between sample groups was observed, but the  $p$ -values of the other four miRNAs  
288 increased (miR-141-3p:  $p = 0.049$  vs  $0.028$ ; miR-222-3p:  $p = 0.026$  vs  $0.008$ ; miR-375-3p:  $p =$   
289  $0.003$  vs  $0.001$ ; miR-483-3p:  $p = 0.022$  vs  $0.009$ ).

290 When comparing the expression of these miRNAs between the recurrence group and the no  
291 recurrence group, normalized with only miR-191-5p, both miR-122-5p ( $p = 0.017$ ) and miR-222-  
292 3p ( $p = 0.017$ ) were still significantly higher in the recurrence group (Figure 3B).

293

### 294 3.2.3 MiRNAs in Adrenal-Dependent Hypercortisolism

295 In serum samples, one miRNA was expressed significantly higher in dogs with a csACT ( $n = 26$ )  
296 compared to healthy dogs ( $n = 6$ ): miR-483-3p ( $p = 0.020$ ), while one miRNA was expressed  
297 significantly lower in dogs with a csACT: miR-223-3p ( $p = 0.038$ ) (Figure 4A).

298

#### 299 3.2.3.1 Histopathological assessment

300 The median Ki67 PI in the csACTs ( $n = 26$ ) was 8.2 % (range 0.3 – 50.7 %), and the median Utrecht  
301 score was 12.6 (range 4.3 – 57.7). Although miR-132-3p and miR-141-3p showed a moderate  
302 correlation with the Utrecht score, either positively (miR-132-3p) or negatively (miR-141-3p),  
303 these correlations were not significant (Table 2). None of the other miRNAs correlated to either the  
304 Ki67 PI or Utrecht score (Table 2).

305 In our previously published introduction of the Utrecht score, we identified three groups with  
306 significantly different survival times after surgery when using cut-off values for the Utrecht score  
307 of  $< 6$ ,  $\geq 6 - < 11$ , and  $\geq 11$ . In the current study, only one csACT had an Utrecht score of  $< 6$ , so  
308 for subsequent analyses we classified the csACTs as having an Utrecht score of  $< 11$  ( $n = 9$ ) or  $\geq$   
309  $11$  ( $n = 17$ ). When comparing miRNA expression between these groups, miR-141-3p was  
310 significantly higher in in the group with an Utrecht score of  $< 11$  than in the group with an Utrecht  
311 score of  $\geq 11$  ( $p = .009$ , Figure 4B). None of the other miRNAs showed significant differences in  
312 expression between these groups (Figure 4B).

313

314

## 315 4 Discussion

316 Circulating miRNAs have been shown to be useful diagnostic and prognostic biomarkers in several  
317 diseases and cancer types (13,24). In this study, we identified several circulating miRNAs that are  
318 differently expressed in dogs with Cushing's syndrome. The most clearly altered miRNA was miR-  
319 122-5p, which was significantly overexpressed in dogs with PDH and did not overlap with  
320 expression in healthy dogs. In addition, miR-122-5p expression was higher in dogs with recurrence  
321 after hypophysectomy than in dogs without reported recurrence. MiR-122-5p might therefore  
322 represent a useful noninvasive biomarker for dogs with PDH.

323 MiR-122<sup>i</sup> is also of interest in other diseases and cancer types, both in humans and in dogs (25–29).  
324 In human cancers, the function of miR-122 seems to be dependent on its cellular context: while it  
325 has been described as an oncomiR in some cancers, including clear cell renal carcinoma (25) and  
326 colon cancer (29), it has been described as a tumor suppressor miRNA in others, including  
327 hepatocellular carcinoma (30) and bladder cancer (31). In several studies, miR-122 was found to  
328 inhibit the expression of aldolase, fructose-bisphosphate A (*ALDOA*) (29,32–34). *ALDOA* is a  
329 glycolytic enzyme that catalyzes the reversible conversion of fructose-1,6-bisphosphate to  
330 glyceraldehyde 3-phosphate and dihydroxyacetone phosphate. Although *ALDOA* is an important  
331 oncogene in several cancer types, including non-small cell lung cancer (35), pancreatic cancer (36)  
332 and hepatocellular carcinoma (37), it is a tumor suppressor in others, including prostate  
333 adenocarcinoma and stomach adenocarcinoma (37). The tumorigenic activity of *ALDOA* therefore  
334 seems to be context-dependent (37), and could potentially explain the context-dependency of miR-  
335 122. The expression of *ALDOA* has not yet been studied in pituitary tumors, which would be an  
336 interesting avenue for future research.

337 Although miR-122 expression has a clear link with cancer, there are also other diseases in which  
338 miR-122 expression can be dysregulated. Because miR-122 is derived from hepatocytes, it was  
339 found to be overexpressed in serum of dogs with different types of liver diseases (27,28,38).  
340 Because hypercortisolism can induce vacuolar hepatopathy (39), the increase in miR-122 levels  
341 seen in dogs with PDH could also be related to liver damage. In future studies, it would be  
342 interesting to determine whether miR-122 levels in dogs with PDH are correlated to their ALT  
343 values, as they were in a previous study on dogs with liver diseases (38). The finding that miR-122-  
344 5p levels in dogs with PDH significantly decreased in post-op samples compared to pre-op samples,  
345 even though the time between surgery and post-op sampling was relatively short (median 3 days,  
346 range 1-7 days) and the dogs still receive high doses of glucocorticoids for the first couple of days  
347 after hypophysectomy, suggests that its expression in dogs with PDH is not related to  
348 hypercortisolism but rather to the pituitary tumorigenesis. In addition, miR-122-5p levels were not  
349 significantly higher in dogs with hypercortisolism caused by a csACT than in healthy dogs. To  
350 validate the hypothesis that miR-122-5p expression is not hypercortisolism-related, it would be  
351 interesting to compare the miRNA expression levels that were found to be altered in this study in  
352 dogs with PDH to those of dogs with iatrogenic Cushing's syndrome.

353 Another miRNA that was overexpressed in dogs with PDH compared to healthy dogs, as well as in  
354 dogs with PDH that had recurrence after hypophysectomy compared to dogs that did not have  
355 recurrence, is miR-222-3p. MiR-222 is overexpressed in many different human cancer types (40).

---

<sup>i</sup> When -3p or -5p miRNA was not specified in mentioned articles, only the miR-locus number will be mentioned

356 A recent study that performed meta-analyses on 17 published articles on miR-222 showed that high  
357 expression of miR-222 significantly predicts poor overall survival in several human cancer types  
358 (41). MiR-222 could therefore also be a useful noninvasive biomarker in dogs with PDH.

359 Of the other four significantly altered miRNAs in PDH found in this study, only one was expressed  
360 significantly lower compared to healthy controls: miR-126-5p. MiR-126 has also been reported to  
361 be downregulated in other diseases in humans, including in diabetes mellitus (42). In contrast,  
362 circulating miR-126 was overexpressed in dogs with different types of neoplasia (43). Possibly, the  
363 miR-126-5p downregulation in the current study is related to the resulting endocrine syndrome, and  
364 not to the pituitary tumor. MiR-141-3p, miR-375-3p miR-483-3p were overexpressed in dogs with  
365 PDH and are also deregulated in several cancer types (44–46). For miR-375-3p, the difference in  
366 expression could also be related to the hypothalamic-pituitary-adrenal axis feedback loop:  
367 expression of miR-375 has been shown to be inhibited by corticotropin-releasing factor (CRF) (47).  
368 Since the high ACTH levels in dogs with PDH will result in low CRF levels (48), this lack of  
369 inhibition could result in higher miR-375p levels.

370 In dogs with csACTs, miR-483-3p was significantly overexpressed compared to healthy dogs. In  
371 humans, miR-483-5p, the reverse miRNA from the miR-483 locus, is one of the most commonly  
372 reported circulating miRNA that is overexpressed in patients with ACC compared to those with  
373 ACA (49–51). Although miR-483-3p is less studied, it is also overexpressed in ACC compared to  
374 ACA in humans (45). In the miRBase database, only the sequence for canine miR-483-3p is  
375 reported. Because of its importance in human ACTs, we nonetheless tested the primers for human  
376 miR-483-5p in our pilot study, but these did not result in a detectable product in the canine samples  
377 (17). Although the overexpression of miR-483-3p in dogs with csACTs compared to healthy dogs  
378 seems to be in line with its overexpression in human ACCs compared to ACAs, we did not see any  
379 differences in its expression when comparing csACTs with an Utrecht score of  $\geq 11$  with those that  
380 had an Utrecht score of  $< 11$ , nor was there a correlation of miR-483-3p expression with Ki67 PI  
381 or Utrecht score. Whether this is related to a difference in classification (e.g., the fact that we only  
382 included cortisol-secreting ACTs, or a potential overrepresentation of carcinomas in the total  
383 csACT group) or a difference in mechanism is currently unknown.

384 MiR-141-3p was expressed significantly lower in dogs with a csACT that had an Utrecht score of  
385  $\geq 11$  than in those with an Utrecht score of  $< 11$ . MiR-141 has been reported as a useful biomarker  
386 in several cancer types, but was shown to be upregulated in some cancer types, including small cell  
387 lung cancer (44), and downregulated in others, including renal cell carcinoma (52). Recently, miR-  
388 141 was shown to inhibit angiogenesis both *in vitro* and *in vivo* (53). Previous research by our group  
389 showed that canine ACCs are in a more proangiogenic state compared to ACAs (54), which might  
390 be related to the decreased expression of miR-141-3p in the csACTs with an Utrecht score of  $\geq 11$ .  
391 In future studies it would be interesting to determine whether miR-141-3p can predict the risk of  
392 recurrence after adrenalectomy.

393 MiRNAs that can predict malignancy or risk of recurrence before surgery would greatly impact  
394 clinical decision making. In dogs with PDH, both miR-122-5p and miR-222-3p were significantly  
395 overexpressed in dogs with recurrence after hypophysectomy compared to those without and are  
396 therefore interesting candidates as noninvasive biomarkers to predict recurrence. However, because  
397 only 3 dogs were included in the “Recurrence” group and 7 in the “No recurrence” group, these  
398 results will have to be validated in larger sample sizes. Additionally, in future studies it would be

399 interesting to take blood samples at different times after surgery to determine the expression levels  
400 of these miRNAs at time of remission, and whether they will increase at time of recurrence before  
401 changes on diagnostic imaging are detectable. If so, these miRNAs could be highly useful early  
402 markers of recurrence.

403 The biggest hurdle in circulating miRNA analyses is data normalization. The five miRNAs that we  
404 originally intended to use as reference miRNAs were not stable enough, so we determined whether  
405 the stability would improve when we added all analyzed miRNAs in the geNorm analysis. Indeed,  
406 when adding more miRNAs, we were able to reach sufficiently stable results for data normalization.  
407 However, although this improves the reliability of our results in the current study, using 12 miRNAs  
408 for data normalization limits the clinical application of detecting circulating miRNAs. We therefore  
409 tested whether the differentially expressed miRNAs in dogs with PDH would retain their  
410 significance when normalized against only one miRNA. Although the *p*-values of some miRNAs  
411 slightly increased, in general the same results were observed as when using 12 miRNAs for  
412 normalization. Using only miR-191-5p, one of the two most stably expressed miRNAs in this study,  
413 as reference miRNA for data normalization therefore seems feasible in dogs with PDH. However,  
414 miR-191-5p can also be dysregulated in different cancer types (55,56), which makes it risky to use  
415 only one miRNA for data normalization. Ideally, to identify miRNAs that are stably expressed in  
416 dogs with different diseases, large-scale experiments should be performed that analyze expression  
417 of all circulating miRNAs with next generation sequencing in groups of dogs with different types  
418 of diseases. This would also help to identify novel useful miRNAs.

419 Overall, the miRNAs seemed to be more stably expressed in the EDTA plasma samples than in the  
420 serum samples as shown in the geNorm analyses. A previous study showed that there can indeed  
421 be differences in stability in EDTA plasma compared to serum samples (57). However, in the  
422 current study, handling of samples after collection could also have influenced the results. For  
423 example, all EDTA plasma samples from dogs with PDH were collected in our University Clinic  
424 and could be processed soon after collection, while samples from the dogs with csACTs were in  
425 several cases sent in from other clinics, so it took longer before the samples were processed and  
426 frozen down. Because of the small differences in EDTA plasma compared to serum samples, we  
427 decided not to directly compare the dogs with PDH to dogs with csACTs. For future studies it  
428 would be interesting to collect blood of all dogs in the same sample types, so that direct comparisons  
429 can be made.

430 To conclude, we have identified several circulating miRNAs that are dysregulated in dogs with  
431 Cushing's syndrome. These miRNAs have the potential to be noninvasive biomarkers that may  
432 contribute to clinical decision-making.

433

## 434 **5 Data availability statement**

435 The datasets generated for this study will be made publicly available through the DataverseNL  
436 data repository (17).

437

## 438 **6 Ethics statement**

439 Ethical review and approval was not required for the study because no experimental interventions  
440 were carried out on the animals. Rest blood samples were collected when blood samples were taken  
441 for diagnostic purposes (dogs with PDH and csACTs) or preventive health screenings (healthy  
442 dogs). Written informed consent was obtained from the owners for the participation of their animals  
443 in this study.

444

## 445 **7 Conflict of Interest**

446 The authors declare that the research was conducted in the absence of any commercial or financial  
447 relationships that could be construed as a potential conflict of interest.

448

## 449 **8 Author Contributions**

450 KS and SG conceived and designed the experiments; KS, AV, AS and ET-S performed the  
451 experiments; KS, AV, HK, FR, BM and SG analyzed the data; HK, SD, FF, SvN and BM  
452 contributed materials; KS, AV and SG wrote the paper. All authors contributed to the article and  
453 approved the final version of the manuscript for submission.

454

## 455 **9 Acknowledgements**

456 We would like to thank Drs. Bart Sjollema, Rob Gerritsen, Giora van Straten, Jenny Buijtels and  
457 Dienneke Jongepier for contributing samples to our csACT dataset; Guy C.M. Grinwis for  
458 histopathological evaluations; all dog owners for letting us use their dogs' samples for this study;  
459 Louis C. Penning for sharing his insights and expertise; and Friends of VetMed for their support.

460

## 461 **References**

- 462 1. Galac S, Reusch CE, Kooistra HS, Rijnberk A. "Adrenals," in *Clinical endocrinology of*  
463 *dogs and cats*, eds. A. Rijnberk, H. S. Kooistra (Schlütersche), 93–154.
- 464 2. Sanders K, Kooistra HS, Galac S. Treating canine Cushing's syndrome: Current options  
465 and future prospects. *Vet J* (2018) 241:42–51. doi:10.1016/j.tvjl.2018.09.014
- 466 3. Teshima T, Hara Y, Takekoshi S, Nezu Y, Harada Y, Yogo T, et al. Trilostane-induced  
467 inhibition of cortisol secretion results in reduced negative feedback at the hypothalamic-  
468 pituitary axis. *Domest Anim Endocrinol* (2009) 36:32–44.  
469 doi:10.1016/j.domaniend.2008.10.002
- 470 4. Sanders K, Galac S, Meij BP. Pituitary tumour types in dogs and cats. *Vet J* (2021)  
471 270:105623. doi:10.1016/j.tvjl.2021.105623
- 472 5. Hanson JM, Teske E, Voorhout G, Galac S, Kooistra HS, Meij BP. Prognostic factors for  
473 outcome after transsphenoidal hypophysectomy in dogs with pituitary-dependent

- 474 hyperadrenocorticism. *J Neurosurg* (2007) 107:830–840. doi:10.3171/JNS-07/10/0830
- 475 6. van Rijn SJ, Galac S, Tryfonidou MA, Hesselink JW, Penning LC, Kooistra HS, et al. The  
476 Influence of Pituitary Size on Outcome After Transsphenoidal Hypophysectomy in a Large  
477 Cohort of Dogs with Pituitary-Dependent Hypercortisolism. *J Vet Intern Med* (2016)  
478 30:989–995. doi:10.1111/jvim.14367
- 479 7. Vastenhout N, van Rijn SJ, Riemers FM, Tryfonidou MA, Meij BP, Penning LC. The  
480 mRNA expression of PTTG1 is a strong prognostic indicator for recurrence after  
481 hypophysectomy in dogs with corticotroph pituitary adenomas. *Vet J* (2018) 240:19–21.  
482 doi:10.1016/j.tvjl.2018.08.012
- 483 8. Labelle P, Kyles AE, Farver TB, de Cock HE V. Indicators of Malignancy of Canine  
484 Adrenocortical Tumors: Histopathology and Proliferation Index. *Vet Pathol* (2004)  
485 41:490–497. doi:10.1354/vp.41-5-490
- 486 9. Sanders K, Cirkel K, Grinwis GCM, Teske E, van Nimwegen SA, Mol JA, et al. The  
487 Utrecht Score: A novel histopathological scoring system to assess the prognosis of dogs  
488 with cortisol-secreting adrenocortical tumours. *Vet Comp Oncol* (2019) 17:329–337.  
489 doi:10.1111/vco.12474
- 490 10. van Sluijs FJ, Sjollem BE, Voorhout G, van den Ingh TS, Rijnberk A. Results of  
491 adrenalectomy in 36 dogs with hyperadrenocorticism caused by adreno-cortical tumour.  
492 *Vet Q* (1995) 17:113–116. doi:10.1080/01652176.1995.9694547
- 493 11. Sanders K, van Staaldouin GJ, Uijens MCM, Mol JA, Teske E, Slob A, et al. Molecular  
494 markers of prognosis in canine cortisol-secreting adrenocortical tumours. *Vet Comp Oncol*  
495 (2019) 17:545–552. doi:10.1111/vco.12521
- 496 12. Schwartz P, Kovak JR, Koprowski A, Ludwig LL, Monette S, Bergman PJ. Evaluation of  
497 prognostic factors in the surgical treatment of adrenal gland tumors in dogs: 41 cases  
498 (1999–2005). *J Am Vet Med Assoc* (2008) 232:77–84. doi:10.2460/javma.232.1.77
- 499 13. Wang H, Peng R, Wang J, Qin Z, Xue L. Circulating microRNAs as potential cancer  
500 biomarkers: the advantage and disadvantage. *Clin Epigenetics* (2018) 10:59.  
501 doi:10.1186/s13148-018-0492-1
- 502 14. Vetrivel S, Zhang R, Engel M, Altieri B, Braun L, Osswald A, et al. Circulating microRNA  
503 Expression in Cushing’s Syndrome. *Front Endocrinol (Lausanne)* (2021) 12:620012.  
504 doi:10.3389/fendo.2021.620012
- 505 15. Beylerli O, Beeraka NM, Gareev I, Pavlov V, Yang G, Liang Y, et al. Mirnas as  
506 noninvasive biomarkers and therapeutic agents of pituitary adenomas. *Int J Mol Sci* (2020)  
507 21:1–15. doi:10.3390/ijms21197287
- 508 16. Kozomara A, Birgaoanu M, Griffiths-Jones S. miRBase: from microRNA sequences to  
509 function. *Nucleic Acids Res* (2019) 47:D155–D162. doi:10.1093/nar/gky1141
- 510 17. Sanders K. DataverseNL data repository: Circulating microRNAs in dogs with Cushing’s  
511 syndrome. 2021 doi:10.34894/XPIIU6
- 512 18. Livak KJ, Schmittgen TD. Analysis of Relative Gene Expression Data Using Real-Time  
513 Quantitative PCR and the  $2^{-\Delta\Delta CT}$  Method. *Methods* (2001) 25:402–408.  
514 doi:10.1006/meth.2001.1262
- 515 19. Vandesompele J, De Preter K, Pattyn I, Poppe B, Van Roy N, De Paepe A, et al. Accurate

- 516 normalization of real-time quantitative RT-PCR data by geometric averaging of multiple  
517 internal control genes. *Genome Biol* (2002) 3:34–1. doi:10.1186/gb-2002-3-7-research0034
- 518 20. Kohl M. SLqPCR: Functions for analysis of real-time quantitative PCR data at SIRS-Lab  
519 GmbH. (2007) doi:10.18129/B9.bioc.SLqPCR
- 520 21. Core Team R. R: A language and environment for statistical computing. (2020) Available  
521 at: <https://www.r-project.org/>
- 522 22. RStudio Team R. RStudio: Integrated Development Environment for R. (2021) Available  
523 at: <http://www.rstudio.com/>
- 524 23. Xiong F, Cheng X, Zhang C, Klar RM, He T. Optimizations for identifying reference  
525 genes in bone and cartilage bioengineering. *BMC Biotechnol* (2021) 21:25.  
526 doi:10.1186/s12896-021-00685-8
- 527 24. Condrat CE, Thompson DC, Barbu MG, Bugnar OL, Boboc A, Cretoiu D, et al. miRNAs  
528 as Biomarkers in Disease: Latest Findings Regarding Their Role in Diagnosis and  
529 Prognosis. *Cells* (2020) 9:276. doi:10.3390/cells9020276
- 530 25. Nie W, Ni D, Ma X, Zhang Y, Gao Y, Peng C, et al. miR-122 promotes proliferation and  
531 invasion of clear cell renal cell carcinoma by suppressing Forkhead box O3. *Int J Oncol*  
532 (2019) 54:559–571. doi:10.3892/ijo.2018.4636
- 533 26. Rupaimoole R, Slack FJ. MicroRNA therapeutics: Towards a new era for the management  
534 of cancer and other diseases. *Nat Rev Drug Discov* (2017) 16:203–221.  
535 doi:10.1038/nrd.2016.246
- 536 27. Dirksen K, Verzijl T, Grinwis GC, Favier RP, Penning LC, Burgener IA, et al. Use of  
537 Serum MicroRNAs as Biomarker for Hepatobiliary Diseases in Dogs. *J Vet Intern Med*  
538 (2016) 30:1816–1823. doi:10.1111/jvim.14602
- 539 28. Oosthuyzen W, Ten Berg PWL, Francis B, Campbell S, Macklin V, Milne E, et al.  
540 Sensitivity and specificity of microRNA-122 for liver disease in dogs. *J Vet Intern Med*  
541 (2018) 32:1637–1644. doi:10.1111/jvim.15250
- 542 29. Li H, Zhang X, Jin Z, Yin T, Duan C, Sun J, et al. MiR-122 Promotes the Development of  
543 Colon Cancer by Targeting ALDOA In Vitro. *Technol Cancer Res Treat* (2019) 18:1–10.  
544 doi:10.1177/1533033819871300
- 545 30. Cheng D, Deng J, Zhang B, He X, Meng Z, Li G, et al. LncRNA HOTAIR epigenetically  
546 suppresses miR-122 expression in hepatocellular carcinoma via DNA methylation.  
547 *EBioMedicine* (2018) 36:159–170. doi:10.1016/j.ebiom.2018.08.055
- 548 31. Wang Y, Xing QF, Liu XQ, Guo ZJ, Li CY, Sun G. MiR-122 targets VEGFC in bladder  
549 cancer to inhibit tumor growth and angiogenesis. *Am J Transl Res* (2016) 8:3056–3066.
- 550 32. Cui K, Jin S, Du Y, Yu J, Feng H, Fan Q, et al. Long noncoding RNA DIO3OS interacts  
551 with miR-122 to promote proliferation and invasion of pancreatic cancer cells through  
552 upregulating ALDOA. *Cancer Cell Int* (2019) 19:202. doi:10.1186/s12935-019-0922-y
- 553 33. Zeng Y, Lv Y, Tao L, Ma J, Zhang H, Xu H, et al. G6PC3, ALDOA and CS induction  
554 accompanies mir-122 downregulation in the mechanical asphyxia and can serve as hypoxia  
555 biomarkers. *Oncotarget* (2016) 7:74526–74536. doi:10.18632/oncotarget.12931
- 556 34. Xu Z, Liu G, Zhang M, Zhang Z, Jia Y, Peng L, et al. MiR-122-5p Inhibits the

- 557 Proliferation, Invasion and Growth of Bile Duct Carcinoma Cells by Targeting ALDOA.  
558 *Cell Physiol Biochem* (2018) 48:2596–2606. doi:10.1159/000492702
- 559 35. Fu H, Gao H, Qi X, Zhao L, Wu D, Bai Y, et al. Aldolase A promotes proliferation and G  
560 1/S transition via the EGFR/MAPK pathway in non-small cell lung cancer. *Cancer*  
561 *Commun (London, England)* (2018) 38:18. doi:10.1186/s40880-018-0290-3
- 562 36. Ji S, Zhang B, Liu J, Qin Y, Liang C, Shi S, et al. ALDOA functions as an oncogene in the  
563 highly metastatic pancreatic cancer. *Cancer Lett* (2016) 374:127–135.  
564 doi:10.1016/j.canlet.2016.01.054
- 565 37. Ma D, Chen X, Zhang PY, Zhang H, Wei LJ, Hu S, et al. Upregulation of the  
566 ALDOA/DNA-PK/p53 pathway by dietary restriction suppresses tumor growth. *Oncogene*  
567 (2018) 37:1041–1048. doi:10.1038/onc.2017.398
- 568 38. Dirksen K, Verzijl T, van den Ingh TSGAM, Vernooij JCM, van der Laan LJW, Burgener  
569 IA, et al. Hepatocyte-derived microRNAs as sensitive serum biomarkers of hepatocellular  
570 injury in Labrador retrievers. *Vet J* (2016) 211:75–81. doi:10.1016/j.tvjl.2016.01.010
- 571 39. Gilor C, Graves TK. Interpretation of laboratory tests for canine cushing’s syndrome. *Top*  
572 *Companion Anim Med* (2011) 26:98–108. doi:10.1053/j.tcam.2011.03.001
- 573 40. Song J, Ouyang Y, Che J, Li X, Zhao Y, Yang K, et al. Potential value of miR-221/222 as  
574 diagnostic, prognostic, and therapeutic biomarkers for diseases. *Front Immunol* (2017)  
575 8:56. doi:10.3389/fimmu.2017.00056
- 576 41. Ravegnini G, Cargnin S, Sammarini G, Zanotti F, Bermejo JL, Hrelia P, et al. Prognostic  
577 Role of miR-221 and miR-222 Expression in Cancer Patients: A Systematic Review and  
578 Meta-Analysis. *Cancers (Basel)* (2019) 11:970. doi:10.3390/cancers11070970
- 579 42. Zampetaki A, Kiechl S, Drozdov I, Willeit P, Mayr U, Prokopi M, et al. Plasma  
580 MicroRNA profiling reveals loss of endothelial MiR-126 and other MicroRNAs in type 2  
581 diabetes. *Circ Res* (2010) 107:810–817. doi:10.1161/CIRCRESAHA.110.226357
- 582 43. Heishima K, Ichikawa Y, Yoshida K, Iwasaki R, Sakai H, Nakagawa T, et al. Circulating  
583 microRNA-214 and -126 as potential biomarkers for canine neoplastic disease. *Sci Rep*  
584 (2017) 7:2301. doi:10.1038/s41598-017-02607-1
- 585 44. Mao S, Lu Z, Zheng S, Zhang H, Zhang G, Wang F, et al. Exosomal miR-141 promotes  
586 tumor angiogenesis via KLF12 in small cell lung cancer. *J Exp Clin Cancer Res* (2020)  
587 39:193. doi:10.1186/s13046-020-01680-1
- 588 45. Decmann A, Perge P, Nyíró G, Darvasi O, Likó I, Borka K, et al. MicroRNA Expression  
589 Profiling in Adrenal Myelolipoma. *J Clin Endocrinol Metab* (2018) 103:3522–3530.  
590 doi:10.1210/jc.2018-00817
- 591 46. Huang X, Yuan T, Liang M, Du M, Xia S, Dittmar R, et al. Exosomal miR-1290 and miR-  
592 375 as prognostic markers in castration-resistant prostate cancer. *Eur Urol* (2015) 67:33–  
593 41. doi:10.1016/j.eururo.2014.07.035
- 594 47. Zhang N, Lin JK, Chen J, Liu XF, Liu JL, Luo HS, et al. MicroRNA 375 mediates the  
595 signaling pathway of corticotropin-releasing factor (CRF) regulating pro-opiomelanocortin  
596 (POMC) Expression by targeting Mitogen-activated protein Kinase 8. *J Biol Chem* (2013)  
597 288:10361–10373. doi:10.1074/jbc.M112.425504
- 598 48. Van Wijk PA, Rijnberk A, Croughs RJM, Voorhout G, Sprang EPM, Mol JA.



- 599 Corticotropin-releasing hormone and adrenocorticotrophic hormone concentrations in  
600 cerebrospinal fluid of dogs with pituitary-dependent hyperadrenocorticism. *Endocrinology*  
601 (1992) 131:2659–2662. doi:10.1210/endo.131.6.1332844
- 602 49. Decmann A, Bancos I, Khanna A, Thomas MA, Turai P, Perge P, et al. Comparison of  
603 plasma and urinary microRNA-483-5p for the diagnosis of adrenocortical malignancy. *J*  
604 *Biotechnol* (2019) 297:49–53. doi:10.1016/j.jbiotec.2019.03.017
- 605 50. Patel D, Boufraquech M, Jain M, Zhang L, He M, Gesuwan K, et al. MiR-34a and miR-483-  
606 5p are candidate serum biomarkers for adrenocortical tumors. *Surg (United States)* (2013)  
607 154:1224–1229. doi:10.1016/j.surg.2013.06.022
- 608 51. Igaz P, Igaz I, Nagy Z, Nyíró G, Szabó PM, Falus A, et al. MicroRNAs in adrenal tumors:  
609 Relevance for pathogenesis, diagnosis, and therapy. *Cell Mol Life Sci* (2015) 72:417–428.  
610 doi:10.1007/s00018-014-1752-7
- 611 52. Chen X, Wang X, Ruan A, Han W, Zhao Y, Lu X, et al. MiR-141 Is a key regulator of  
612 renal cell carcinoma proliferation and metastasis by controlling EphA2 expression. *Clin*  
613 *Cancer Res* (2014) 20:2617–2630. doi:10.1158/1078-0432.CCR-13-3224
- 614 53. Dong H, Weng C, Bai R, Sheng J, Gao X, Li L, et al. The regulatory network of miR-141  
615 in the inhibition of angiogenesis. *Angiogenesis* (2019) 22:251–262. doi:10.1007/s10456-  
616 018-9654-1
- 617 54. Kool MMJ, Galac S, Kooistra HS, Mol JA. Expression of angiogenesis-related genes in  
618 canine cortisol-secreting adrenocortical tumors. *Domest Anim Endocrinol* (2014) 47:73–82.  
619 doi:10.1016/j.domaniend.2013.11.004
- 620 55. Zhou L yong, Zhang F wei, Tong J, Liu F. MiR-191-5p inhibits lung adenocarcinoma by  
621 repressing SATB1 to inhibit Wnt pathway. *Mol Genet Genomic Med* (2020) 8:e1043.  
622 doi:10.1002/mgg3.1043
- 623 56. Ashirbekov Y, Abaildayev A, Omarbayeva N, Botbayev D, Belkozhayev A, Askandirova  
624 A, et al. Combination of circulating miR-145-5p/miR-191-5p as biomarker for breast  
625 cancer detection. *PeerJ* (2020) 8:e10494. doi:10.7717/peerj.10494
- 626 57. Glinge C, Clauss S, Boddum K, Jabbari R, Jabbari J, Risgaard B, et al. Stability of  
627 Circulating Blood-Based MicroRNAs – Pre-Analytic Methodological Considerations.  
628 *PLoS One* (2017) 12:e0167969. doi:10.1371/journal.pone.0167969
- 629
- 630

631 **Figures**

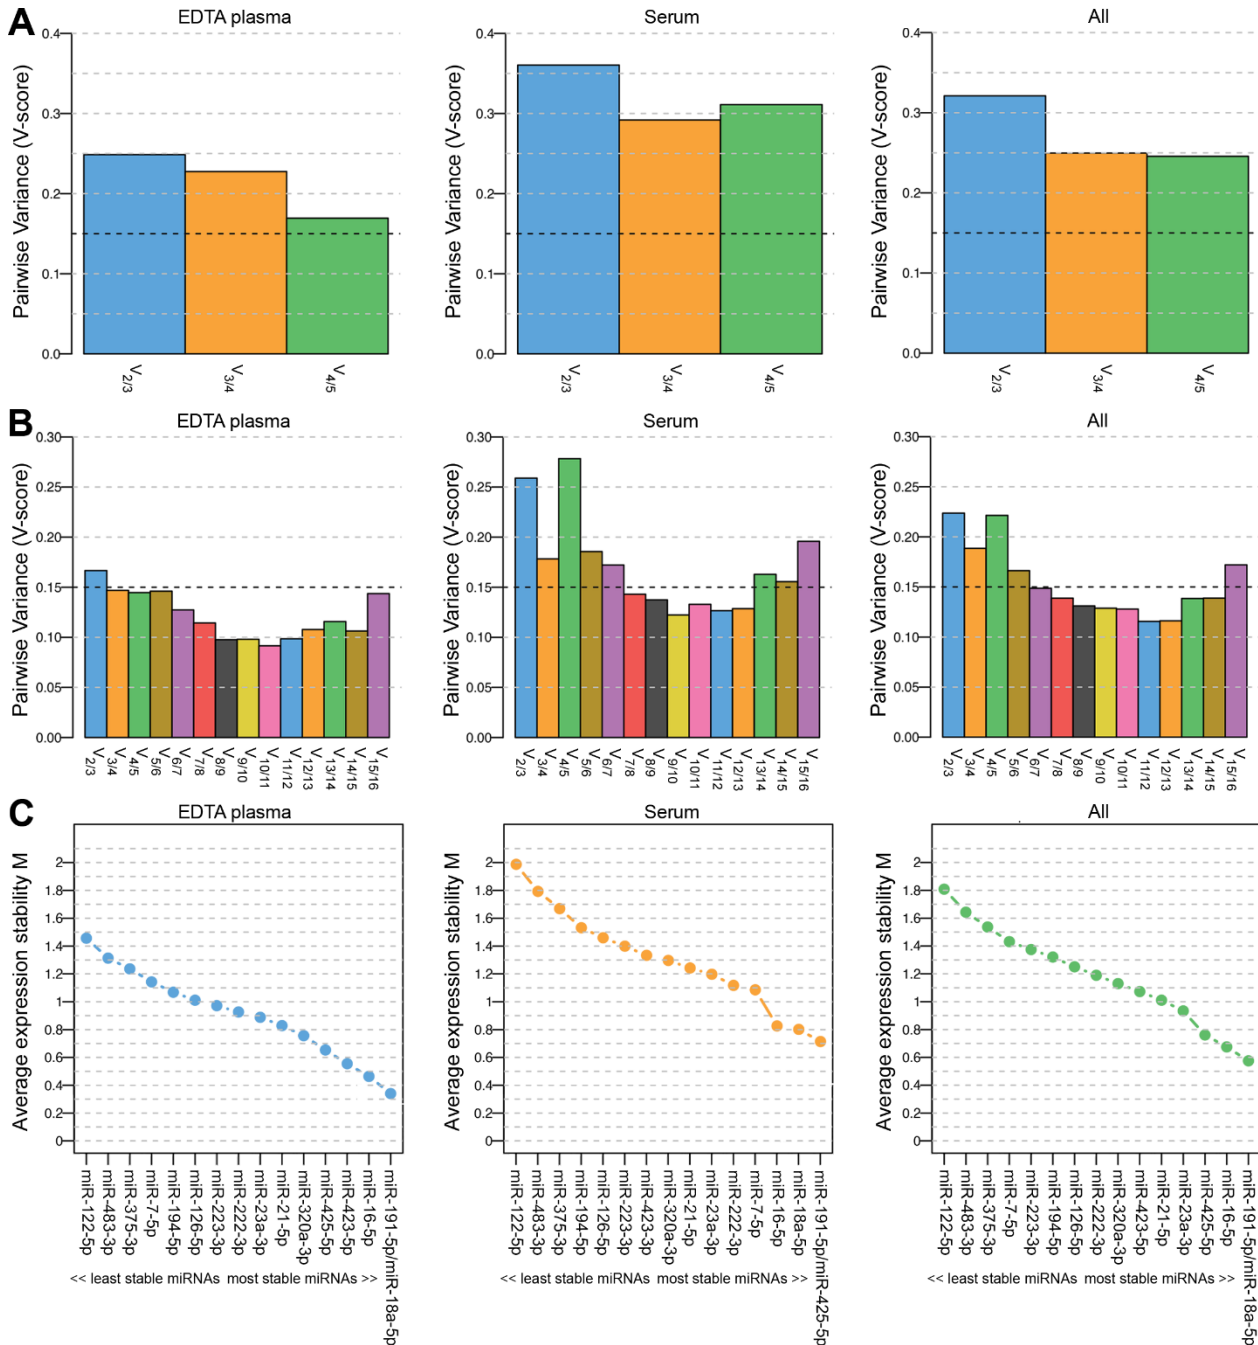

632

633 **Figure 1** Pairwise Variance (V-score; A and B) and Average expression stability M (C) of miRNAs  
 634 included in geNorm analyses to determine the optimal number of miRNAs for data normalization.  
 635 Results when including 5 (A; miR-23a-3p, miR-191-5p, miR-222-3p, miR-423-5p and miR-425-  
 636 5p) and when including 16 (B and C; miR-7-5p, miR-16-5p, miR-18a-5p, miR-21-5p, miR-23a-3p,  
 637 miR-122-5p, miR-126-5p, miR-191-5p, miR-194-5p, miR-222-3p, miR-223-3p, miR-320a-3p,  
 638 miR-375-3p, miR-423-5p, miR-425-5p and miR-483-3p) miRNAs. Left panels (EDTA plasma)  
 639 include samples from healthy dogs ( $n = 6$ ) and from dogs with pituitary-dependent hypercortisolism  
 640 ( $n = 19$ , pre-op and post-op samples); middle panels (serum) include samples from healthy dogs ( $n$   
 641  $= 6$ ) and from dogs with cortisol-secreting adrenocortical tumors ( $n = 26$ ); right panels (all) include  
 642 both EDTA plasma and serum samples ( $n = 76$ ).

643

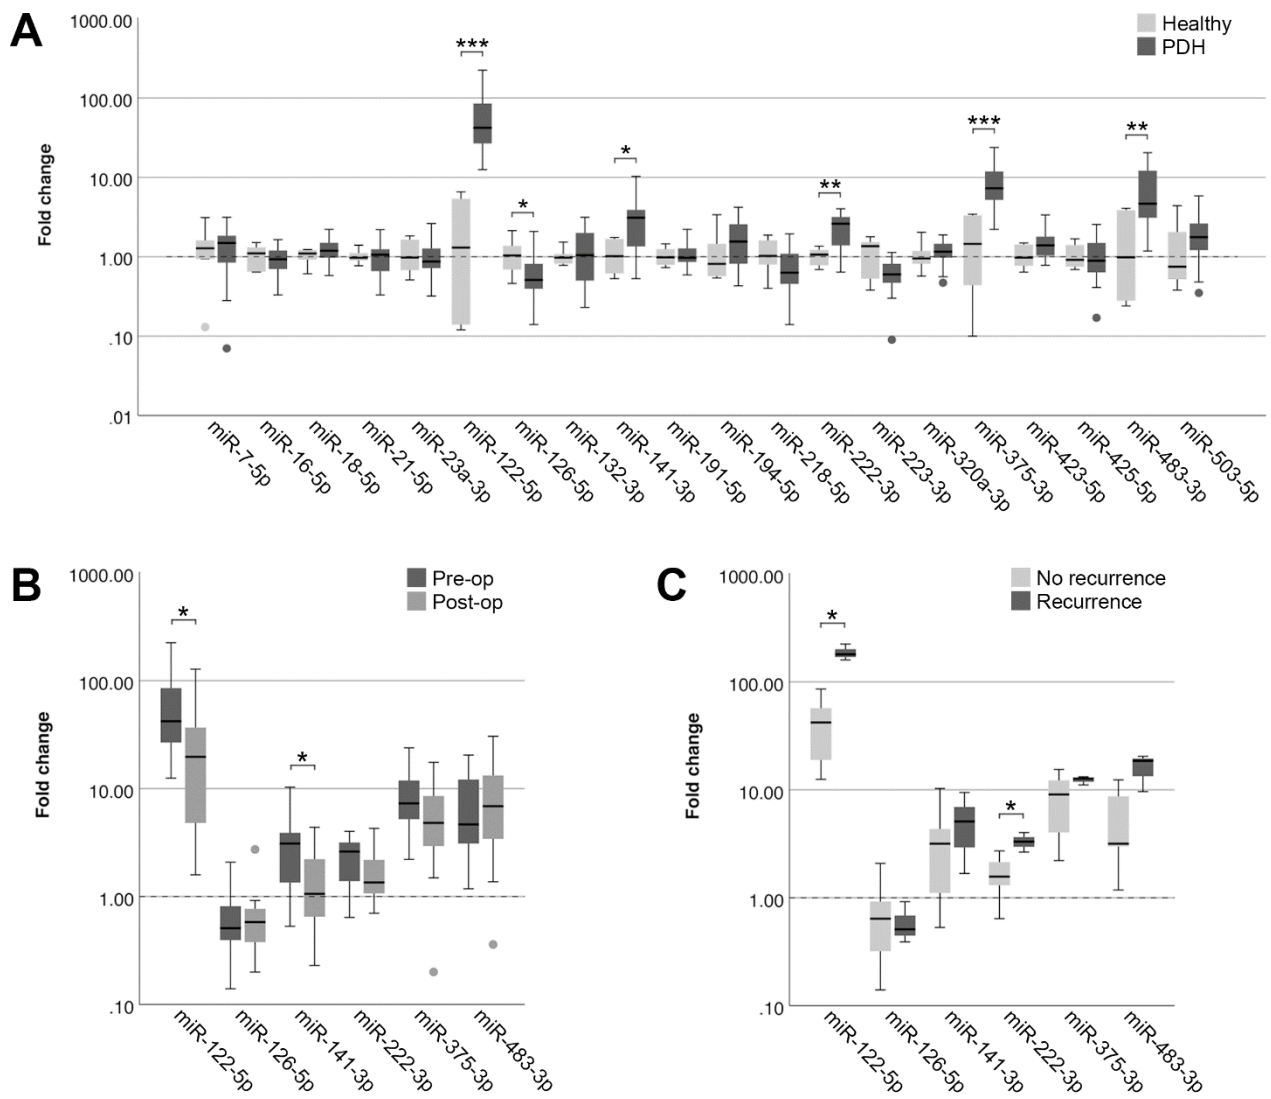

644

645 **Figure 2** Circulating miRNA expression levels in EDTA plasma samples, normalized with  $V_{\min}$   
 646 (12 most stably expressed miRNAs), in (A) dogs with PDH ( $n = 19$ ) and healthy dogs ( $n = 6$ ); (B)  
 647 dogs with PDH ( $n = 19$ ) before (pre-op) and after (post-op) hypophysectomy; and (C) dogs with  
 648 PDH with ( $n = 3$ ) or without ( $n = 7$ ) recurrence of hypercortisolism within a year after  
 649 hypophysectomy. Circles above and below boxes indicate outliers. \*  $p < 0.05$ ; \*\*  $p < 0.01$ ; \*\*\*  $p$   
 650  $< 0.001$ . PDH = pituitary-dependent hypercortisolism.

651

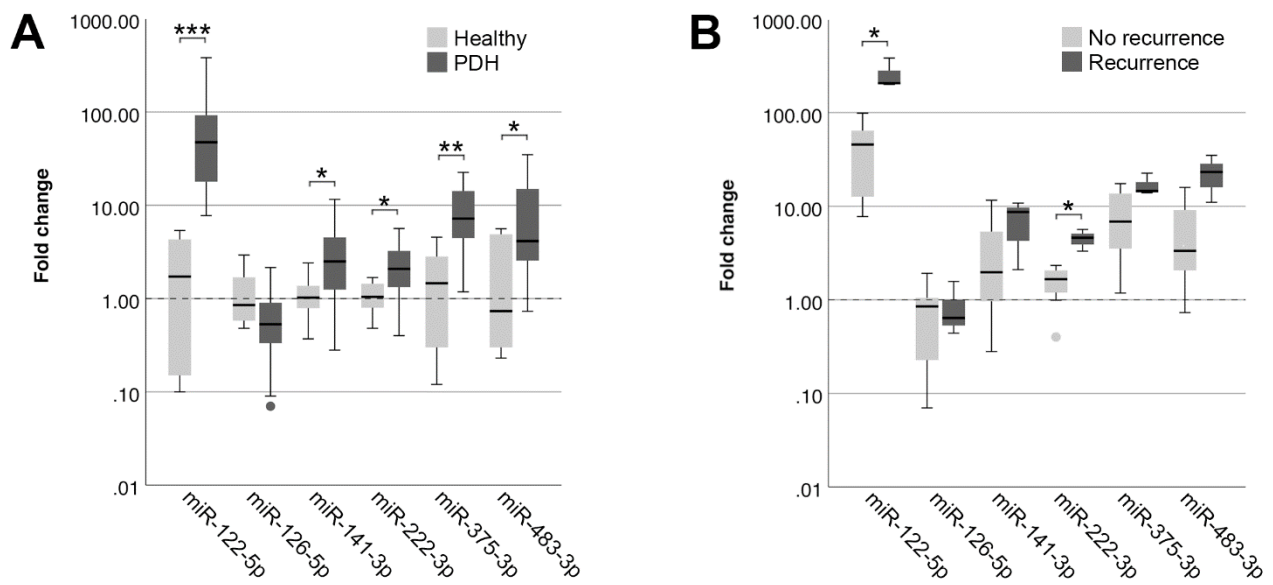

652

653 **Figure 3** Circulating miRNA expression levels in EDTA plasma samples, normalized with only  
654 miR-191-5p, in (A) dogs with PDH ( $n = 19$ ) and healthy dogs ( $n = 6$ ); and (B) dogs with PDH with  
655 ( $n = 3$ ) or without ( $n = 7$ ) recurrence of hypercortisolism within a year after hypophysectomy.  
656 Circles below boxes indicate outliers. \*  $p < 0.05$ ; \*\*  $p < 0.01$ ; \*\*\*  $p < 0.001$ . PDH = pituitary-  
657 dependent hypercortisolism.

658

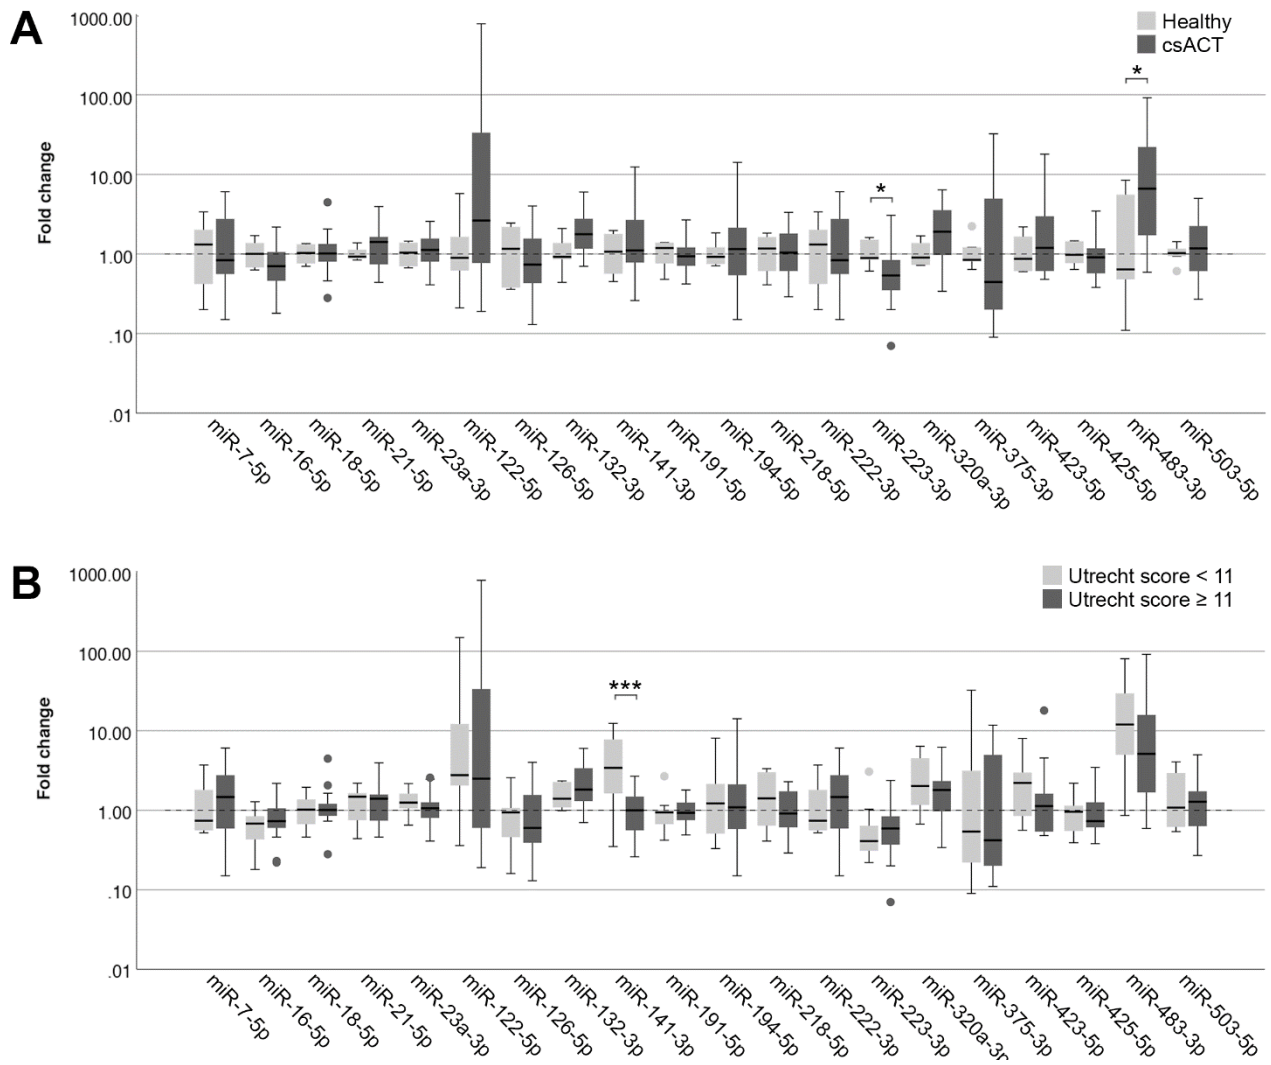

659

660 **Figure 4** Circulating miRNA expression levels in serum samples, normalized with  $V_{\min}$  (12 most  
661 stably expressed miRNAs), in (A) dogs with a csACT ( $n = 26$ ) and healthy dogs ( $n = 6$ ); and (B)  
662 dogs with a csACT with an Utrecht score below 11 ( $n = 9$ ) compared to those with a score of 11 or  
663 dogs with a score of 11 or more ( $n = 17$ ). Circles above and below boxes indicate outliers. \*  $p < 0.05$ ; \*\*\*  $p < 0.001$ . csACT  
664 = cortisol-secreting adrenocortical tumor.

665

666 **Tables**

667 **Table 1** Correlation of pre-operative circulating miRNA expression with pituitary height to brain  
668 area value in dogs with PDH. Data analyzed with the Spearman's rank correlation coefficient test.

|             | Correlation coefficient (r) | Significance (2-tailed; <i>p</i> ) | Number ( <i>n</i> ) |
|-------------|-----------------------------|------------------------------------|---------------------|
| miR-7-5p    | 0.207                       | 0.395                              | 19                  |
| miR-16-5p   | 0.044                       | 0.857                              | 19                  |
| miR-18a-5p  | -0.029                      | 0.908                              | 19                  |
| miR-21-5p   | -0.083                      | 0.737                              | 19                  |
| miR-23a-3p  | -0.201                      | 0.409                              | 19                  |
| miR-122-5p  | 0.179                       | 0.463                              | 19                  |
| miR-126-5p  | -0.309                      | 0.198                              | 19                  |
| miR-132-3p  | -0.151                      | 0.563                              | 17                  |
| miR-141-3p  | 0.145                       | 0.554                              | 19                  |
| miR-191-5p  | 0.051                       | 0.836                              | 19                  |
| miR-194-5p  | 0.193                       | 0.428                              | 19                  |
| miR-218-5p  | -0.071                      | 0.772                              | 19                  |
| miR-222-3p  | 0.175                       | 0.474                              | 19                  |
| miR-223-3p  | 0.035                       | 0.887                              | 19                  |
| miR-320a-3p | 0.247                       | 0.307                              | 19                  |
| miR-375-3p  | 0.067                       | 0.786                              | 19                  |
| miR-423-5p  | -0.116                      | 0.637                              | 19                  |
| miR-425-5p  | 0.105                       | 0.668                              | 19                  |
| miR-483-3p  | 0.023                       | 0.926                              | 19                  |
| miR-503-5p  | 0.068                       | 0.788                              | 18                  |

669

670 **Table 2** Correlation of circulating miRNA expression with Ki67 proliferation index (PI) and  
 671 Utrecht score in dogs with csACTs. Data analyzed with the Spearman's rank correlation  
 672 coefficient test.

|             | <b>Ki67 PI</b><br>Correlation<br>coefficient ( <i>r</i> ) | <b>Ki67 PI</b><br><i>P</i> -value | <b>Utrecht score</b><br>Correlation<br>coefficient ( <i>r</i> ) | <b>Utrecht score</b><br><i>P</i> -value | Number<br>( <i>n</i> ) |
|-------------|-----------------------------------------------------------|-----------------------------------|-----------------------------------------------------------------|-----------------------------------------|------------------------|
| miR-7-5p    | 0.027                                                     | 0.896                             | 0.015                                                           | 0.942                                   | 26                     |
| miR-16-5p   | -0.047                                                    | 0.822                             | 0.030                                                           | 0.883                                   | 26                     |
| miR-18a-5p  | -0.037                                                    | 0.858                             | -0.066                                                          | 0.750                                   | 26                     |
| miR-21-5p   | -0.167                                                    | 0.414                             | -0.034                                                          | 0.870                                   | 26                     |
| miR-23a-3p  | -0.024                                                    | 0.909                             | -0.093                                                          | 0.651                                   | 26                     |
| miR-122-5p  | -0.175                                                    | 0.391                             | -0.063                                                          | 0.759                                   | 26                     |
| miR-126-5p  | -0.091                                                    | 0.660                             | -0.064                                                          | 0.758                                   | 26                     |
| miR-132-3p  | 0.274                                                     | 0.243                             | 0.406                                                           | 0.076                                   | 20                     |
| miR-141-3p  | -0.188                                                    | 0.415                             | -0.406                                                          | 0.068                                   | 21                     |
| miR-191-5p  | 0.267                                                     | 0.187                             | 0.241                                                           | 0.235                                   | 26                     |
| miR-194-5p  | -0.127                                                    | 0.538                             | -0.062                                                          | 0.763                                   | 26                     |
| miR-218-5p  | -0.121                                                    | 0.565                             | -0.156                                                          | 0.456                                   | 25                     |
| miR-222-3p  | 0.027                                                     | 0.896                             | 0.015                                                           | 0.942                                   | 26                     |
| miR-223-3p  | -0.042                                                    | 0.840                             | 0.031                                                           | 0.881                                   | 26                     |
| miR-320a-3p | 0.162                                                     | 0.428                             | 0.026                                                           | 0.901                                   | 26                     |
| miR-375-3p  | -0.091                                                    | 0.657                             | -0.024                                                          | 0.909                                   | 26                     |
| miR-423-5p  | 0.166                                                     | 0.418                             | 0.015                                                           | 0.941                                   | 26                     |
| miR-425-5p  | 0.013                                                     | 0.948                             | 0.009                                                           | 0.966                                   | 26                     |
| miR-483-3p  | -0.105                                                    | 0.610                             | -0.187                                                          | 0.360                                   | 26                     |
| miR-503-5p  | -0.031                                                    | 0.885                             | -0.029                                                          | 0.894                                   | 24                     |

673
